# Supplementary material for: Phenotype characteristics of gastric epithelial mucus in patients with different gastric diseases: from superficial gastritis to gastric cancer
Source: PeerJ. 2021 Feb 25;9:e10822. doi: 10.7717/peerj.10822 (PMC7916529; doi:10.7717/peerj.10822)
Supplement: Supplemental Information 1 [file peerj-09-10822-s001.xlsx]

## Sheet: Sheet1
Cases	Sex	Age	Diagnosis	H.pylori Status	Mucus phenotype	Type of acid mucus phenotype	The position of AG	The degree of AG	The grade of GD	GC Type	acid mucus adjacent to GC	acid mucus adjacent to GD
1	M	51	GC	Positive	acidic	III				Diffuse
2	M	63	AG		acidic	III	Corpus	Severe
3	M	88	GC		Mucus-free					Unclassifiable	III
4	M	62	AG		neutral		Antrum	Mild
5	M	43	GD		Mucus-free				Low			III
6	M	62	GD		acidic	III			High
7	M	62	GD		Mucus-free				Low			III
8	F	63	GC		acidic	III				Diffuse
9	M	69	GD		acidic	III			Low
10	F	74	AG		acidic	I	Angle	Severe
11	M	28	GC		acidic	III				Diffuse
12	F	51	GD		Mucus-free				High
13	M	57	AG	Positive	acidic	III	Antrum	Moderate
14	M	48	AG		acidic	III	Antrum	Moderate
15	F	40	GC		Mucus-free					Diffuse
16	M	54	GC		acidic	II				Diffuse
17	M	49	GD	Positive	Mucus-free				Low
18	M	68	AG		acidic	III	Corpus	Moderate
19	M	62	AG		acidic	III	Antrum	Moderate
20	F	66	GC		Mucus-free					Diffuse
21	F	63	AG	Positive	acidic	I	Antrum	Mild
22	M	71	GD		acidic	III			Low			III
23	F	58	GD		acidic	III			High
24	M	61	GD		neutral				Low
25	M	43	GC		acidic	I				Unclassifiable
26	F	70	GD		Mucus-free				High
27	M	67	AG		acidic	III	Antrum	Moderate
28	M	66	GD		Mucus-free				High		III	III
29	F	64	AG		acidic	III	Antrum	Moderate
30	F	64	GD		neutral				Low
31	F	73	GC		acidic	I				Unclassifiable
32	M	57	AG	Negative	acidic	III	Antrum	Moderate
33	F	53	AG		Mucus-free		Angle	Moderate
34	M	67	GC		Mucus-free					Diffuse
35	M	60	GC		acidic	III				Intestinal
36	M	49	GD		Mucus-free				High
37	M	70	GC		acidic	III				Intestinal
38	F	62	AG		acidic	III	Antrum	Moderate
39	M	61	GC		Mucus-free					Diffuse
40	M	63	GD		Mucus-free				High
41	F	62	AG		acidic	III	Angle	Moderate
42	F	58	AG	Negative	acidic	III	Antrum	Moderate
43	F	76	GC	Negative	acidic	III				Intestinal
44	M	76	GD		Mucus-free				High		III	III
45	M	68	GC		Mucus-free					Diffuse
46	F	51	GC		acidic	III				Diffuse
47	F	65	GD		acidic	II			Low
48	M	63	GC		Mucus-free					Intestinal	III
49	F	57	GC		Mucus-free					Diffuse
50	M	62	GC		acidic	III				Diffuse
51	F	62	AG	Positive	acidic	III	Antrum	Moderate
52	M	67	GC		Mucus-free					Intestinal	III
53	M	59	GD		Mucus-free				High		III	III
54	M	67	GC		Mucus-free					Intestinal	III
55	F	50	AG	Positive	acidic	I	Antrum	Moderate
56	M	67	GD	Positive	Mucus-free				High		III	III
57	M	68	GC		Mucus-free					Diffuse	III
58	F	71	GD		acidic	III			Low			III
59	M	71	GD	Positive	acidic	III			Low
60	M	55	AG		acidic	III	Antrum	Moderate
61	M	60	GC		acidic	III				Intestinal	III
62	M	48	GD		acidic	III			High
63	F	61	GC		Mucus-free					Intestinal
64	M	58	GD		acidic	III			High
65	M	56	GD		acidic	III			High
66	F	83	GC		acidic	III				Intestinal
67	M	67	GC		Mucus-free					Intestinal	III
68	M	66	GD		acidic	III			High
69	F	76	GC	Negative	acidic	III				Mix	III
70	M	79	GC	Negative	Mucus-free					Intestinal	III
71	M	57	GC		Mucus-free					Intestinal	III
72	M	79	AG	Negative	acidic	III	Angle	Moderate
73	F	59	GD		Mucus-free				High		III	III
74	M	44	GD		acidic	II			Low			III
75	M	46	GD	Positive	Mucus-free				Low			III
76	M	57	AG	Positive	acidic	III	Antrum	Severe
77	F	73	GD		acidic	III			High		III	III
78	M	63	GD		acidic	III			High
79	M	57	GC		Mucus-free					Intestinal	III
80	F	57	GC	Positive	Mucus-free					Intestinal	III
81	M	44	GD	Positive	Mucus-free				High		III	III
82	M	68	AG		neutral		Antrum	Mild
83	F	63	AG		acidic	III	Antrum	Moderate
84	F	58	GC		Mucus-free					Diffuse
85	M	56	GC		Mucus-free					Mix
86	M	76	GD		Mucus-free				High
87	M	63	AG		acidic	III	Angle	Severe
88	F	73	GC	Negative	Mucus-free					Intestinal	I
89	M	49	GD	Positive	Mucus-free				High		III	III
90	M	64	GC		Mucus-free					Diffuse	III
91	M	65	GC		Mucus-free					Intestinal	III
92	M	65	GD		Mucus-free				Low			III
93	F	53	GD		acidic	II			Low
94	M	63	GC		Mucus-free					Intestinal
95	F	71	GC	Positive	Mucus-free					Intestinal	III
96	M	66	GC		Mucus-free					Intestinal	III
97	F	74	GC		Mucus-free					Intestinal	III
98	F	78	AG		acidic	III	Corpus	Severe
99	F	61	GD	Negative	neutral				Low
100	M	61	AG	Positive	Mucus-free		Antrum	Mild
101	M	48	GC		Mucus-free					Intestinal
102	M	65	GC		Mucus-free					Intestinal	III
103	F	59	GC		Mucus-free					Diffuse
104	M	88	GD	Positive	acidic	III			Low
105	F	59	AG		acidic	III	Antrum	Severe
106	M	78	GD		Mucus-free				Low			III
107	F	81	GC	Positive	Mucus-free					Intestinal
108	M	61	GC		Mucus-free					Unclassifiable
109	F	50	AG	Positive	neutral		Antrum	Moderate
110	M	80	GD	Positive	Mucus-free				High
111	M	60	GC		Mucus-free					Intestinal
112	F	74	AG		acidic	III	Angle	Mild
113	M	80	GD	Positive	Mucus-free				High		III	III
114	F	59	GD	Negative	neutral				Low
115	M	73	GC	Positive	Mucus-free					Diffuse	III
116	F	81	GC	Positive	Mucus-free					Diffuse	III
117	F	57	GD		Mucus-free				High		III	III
118	M	65	GC		Mucus-free					Intestinal
119	M	68	AG	Positive	neutral		Antrum	Moderate
120	F	64	GD		Mucus-free				High		III	III
121	M	75	GD		Mucus-free				High		III	III
122	F	58	GC		Mucus-free					Diffuse
123	M	60	GD		neutral				Low
124	F	53	GC		Mucus-free					Intestinal
125	F	80	AG		acidic	III	Angle	Moderate
126	M	51	GC		Mucus-free					Diffuse
127	F	64	GC		acidic	III				Diffuse
128	F	64	GD	Positive	acidic	III			Low
129	F	62	GC		Mucus-free					Diffuse
130	F	43	AG		acidic	III	Corpus	Moderate
131	M	70	GD		acidic	III			Low
132	F	52	GD		neutral				High
133	F	66	GD	Negative	Mucus-free				High		III	III
134	F	61	GC		Mucus-free					Intestinal	III
135	M	60	GC		Mucus-free					Unclassifiable
136	M	65	GC		Mucus-free					Intestinal	III
137	M	45	GD	Negative	neutral				High
138	M	64	GD		acidic	III			Low
139	M	76	GD	Positive	Mucus-free				High		I	I
140	F	59	AG	Positive	Mucus-free		Antrum	Mild
141	F	38	GD	Negative	Mucus-free				High		II	II
142	M	58	AG	Negative	acidic	III	Antrum	Severe
143	M	76	GD	Negative	Mucus-free				High		II	II
144	M	76	GC	Negative	Mucus-free					Intestinal
145	M	65	GC	Negative	Mucus-free					Intestinal	III
146	M	45	GD	Positive	Mucus-free				High		III	III
147	M	60	GC		Mucus-free					Intestinal	III
148	M	67	GD		Mucus-free				Low			III
149	M	77	GC		Mucus-free					Diffuse	III
150	F	68	GD		acidic	III			Low
151	M	60	GD	Positive	neutral				Low
152	M	61	GC		Mucus-free					Intestinal
153	M	70	GD	Negative	acidic	III			Low
154	M	70	GD	Negative	acidic	III			Low
155	M	67	GD		acidic	I			Low
156	F	64	GD	Negative	neutral				Low
157	F	64	GD	Negative	acidic	III			Low
158	M	74	GD		Mucus-free				High		III	III
159	F	70	GC		Mucus-free					Diffuse	III
160	M	62	GC	Negative	Mucus-free					Intestinal
161	M	68	GC		Mucus-free					Diffuse	III
162	M	68	GC		Mucus-free					Intestinal	III
163	M	56	AG		acidic	III	Corpus	Mild
164	M	41	GC		neutral					Intestinal
165	M	59	GD		acidic	III			Low			III
166	F	66	GD		neutral				Low
167	F	62	AG	Positive	acidic	I	Antrum	Mild
168	F	57	GC		Mucus-free					Intestinal	III
169	M	60	AG	Positive	acidic	I	Antrum	Severe
170	F	63	AG	Positive	acidic	I	Antrum	Moderate
171	F	64	AG	Positive	acidic	III	Antrum	Severe
172	F	61	AG	Positive	acidic	III	Antrum	Moderate
173	F	73	GC	Positive	Mucus-free					Unclassifiable
174	M	60	AG	Positive	neutral		Antrum	Moderate
175	M	61	GD	Negative	acidic	III			Low
176	F	78	GD		Mucus-free				High
177	M	63	GC		Mucus-free					Intestinal	III
178	F	67	AG		acidic	III	Antrum	Moderate
179	M	62	AG	Positive	neutral		Antrum	Mild
180	F	62	AG	Positive	acidic	I	Antrum	Moderate
181	M	68	GD	Positive	Mucus-free				High		III	III
182	M	36	GD		neutral				High
183	M	47	GC		acidic	II				Intestinal	I
184	M	58	GD		acidic	III			Low		III	III
185	M	75	AG	Positive	acidic	II	Antrum	Moderate
186	F	60	GD	Positive	neutral				Low			III
187	M	63	GD	Positive	Mucus-free				High
188	M	68	GD		acidic	I			Low
189	M	68	GD		acidic	II			Low
190	M	46	GD		acidic	I			Low
191	F	62	AG		acidic	III	Antrum	Moderate
192	F	57	AG	Positive	acidic	I	Antrum	Moderate
193	M	73	GC	Positive	acidic	III				Diffuse
194	M	55	GC		Mucus-free					Diffuse
195	F	66	AG	Positive	neutral		Angle	Mild
196	F	28	GC		acidic	III				Diffuse
197	F	71	GD	Positive	neutral				Low
198	M	60	AG	Negative	acidic	III	Antrum	Severe
199	F	61	GD		neutral				Low			I
200	M	42	AG	Positive	acidic	III	Antrum	Severe
201	M	79	GC		Mucus-free					Diffuse	III
202	M	69	GC	Positive	Mucus-free					Intestinal	III
203	F	51	AG	Positive	acidic	II	Corpus	Severe
204	M	56	GD	Positive	acidic	III			High
205	M	55	GD		neutral				Low
206	M	75	AG		acidic	II	Angle	Moderate
207	M	50	GC	Positive	acidic	II				Diffuse
208	M	59	AG	Positive	neutral		Angle	Moderate
209	M	56	GC		Mucus-free					Unclassifiable
210	M	46	GC		Mucus-free					Intestinal	III
211	M	50	AG	Positive	acidic	I	Antrum	Mild
212	M	51	GD	Positive	acidic	III			Low
213	M	68	GD		acidic	II			Low			III
214	M	46	GD		Mucus-free				High
215	F	58	AG	Positive	acidic	III	Corpus	Moderate
216	M	51	AG	Positive	acidic	III	Antrum	Moderate
217	F	56	GC		Mucus-free					Diffuse
218	M	79	AG	Negative	acidic	III	Angle	Mild
219	F	61	AG	Positive	acidic	II	Antrum	Moderate
220	M	70	GD	Positive	Mucus-free				High		III	III
221	M	70	GC	Positive	Mucus-free					Intestinal	III
222	F	46	AG	Positive	neutral		Antrum	Mild
223	F	65	GD		neutral				Low
224	M	60	GC		Mucus-free					Intestinal	III
225	M	46	GD	Positive	neutral				Low
226	M	64	GD		Mucus-free				High		III	III
227	F	52	AG	Positive	acidic	III	Corpus	Moderate
228	F	28	GC		acidic	II				Unclassifiable	I
229	M	61	GC	Positive	Mucus-free					Intestinal
230	M	62	GD		neutral				Low			III
231	M	47	GD		acidic	III			Low
232	F	72	GD		acidic	III			Low
233	M	62	GD		acidic	II			Low
234	M	60	GC		Mucus-free					Intestinal	I
235	M	60	GC		Mucus-free					Intestinal	III
236	F	65	GC		acidic	III				Intestinal
237	M	62	AG		acidic	III	Antrum	Moderate
238	F	48	GC		Mucus-free					Diffuse	III
239	M	53	GD	Positive	Mucus-free				High		III	III
240	M	56	GD	Positive	neutral				Low
241	F	65	GD		Mucus-free				Low
242	F	67	GC	Positive	Mucus-free					Intestinal	III
243	F	80	GD		Mucus-free				High		III	III
244	F	64	GC	Negative	acidic	III				Unclassifiable
245	M	84	GC		neutral					Intestinal	II
246	F	51	GC		Mucus-free					Diffuse	I
247	F	45	GC		Mucus-free					Intestinal
248	M	66	GC		Mucus-free					Diffuse
249	M	66	GC		Mucus-free					Diffuse
250	F	55	GC		acidic	III				Diffuse
251	F	49	GC		Mucus-free					Unclassifiable
252	F	74	GC	Negative	neutral					Intestinal
253	F	37	GD	Positive	neutral				Low
254	M	79	GC	Positive	acidic	III				Intestinal
255	M	57	GD		Mucus-free				High		III	III
256	M	50	GC		acidic	III				Unclassifiable
257	M	53	GD	Negative	neutral				Low
258	M	44	GD		neutral				Low
259	M	65	GD	Positive	acidic	III			Low
260	M	52	GD		neutral				Low
261	M	60	GD		neutral				Low
262	M	53	AG	Negative	acidic	I	Antrum	Moderate
263	M	63	GD	Positive	acidic	III			Low
264	M	79	AG		neutral		Antrum	Moderate
265	F	79	GD		neutral				Low
266	F	79	AG		acidic	II	Angle	Moderate
267	M	49	GD		Mucus-free				High		III	III
268	F	45	GC		Mucus-free					Unclassifiable
269	M	77	GC		acidic	III				Intestinal
270	M	66	GC		Mucus-free					Diffuse	III
271	F	58	GC	Positive	Mucus-free					Diffuse
272	M	69	GD	Positive	Mucus-free				High		III	III
273	M	71	GD	Negative	Mucus-free				High		III
274	M	56	GC		Mucus-free					Intestinal	III
275	F	46	GD		neutral				Low
276	M	64	GD		Mucus-free				High
277	F	62	GD		neutral				Low
278	M	71	GD		acidic	III			Low
279	M	82	GC		Mucus-free					Unclassifiable
280	F	52	GD	Positive	acidic	II			Low
281	M	69	GD	Negative	acidic	III			Low
282	M	59	GD	Negative	Mucus-free				High
283	M	64	GC		Mucus-free					Intestinal	III
284	M	69	GC	Positive	neutral					Intestinal	III
285	M	56	GC		Mucus-free					Intestinal	III
286	M	60	GD		Mucus-free				High
287	F	68	GC	Negative	Mucus-free					Unclassifiable
288	M	30	GC		Mucus-free					Unclassifiable
289	M	58	GD		Mucus-free				High		I	I
290	M	58	GC		Mucus-free					Unclassifiable
291	M	62	GC		Mucus-free					Unclassifiable
292	M	67	GD	Positive	Mucus-free				High		I	I
293	M	61	GC		Mucus-free					Unclassifiable	III
294	M	87	GC		Mucus-free					Intestinal	III
295	M	59	AG	Positive	acidic	III	Corpus	Severe
296	F	70	AG	Positive	acidic	III	Antrum	Moderate
297	M	53	GD		neutral				Low
298	M	65	GD		acidic	III			Low
299	F	60	GC	Negative	Mucus-free					Unclassifiable
300	M	56	GD		neutral				Low
301	F	53	GD	Positive	acidic	III			Low			I
302	M	65	AG	Positive	neutral		Corpus	Severe
303	M	72	AG		acidic	III	Antrum	Severe
304	F	48	GC		Mucus-free					Intestinal	III
305	F	66	GD		neutral				Low
306	M	59	GD	Positive	Mucus-free				High		III	III
307	F	63	GC		Mucus-free					Unclassifiable
308	F	63	GD		Mucus-free				High
309	M	60	GC	Positive	Mucus-free					Intestinal
310	M	49	GD		acidic	II			Low			II
311	F	82	GD	Negative	acidic	II			Low
312	F	57	GD		Mucus-free				High
313	M	71	GC	Negative	Mucus-free					Intestinal	III
314	M	77	GC		acidic	III				Intestinal
315	M	65	AG		acidic	III	Antrum	Mild
316	M	51	GC	Positive	Mucus-free					Intestinal	III
317	F	54	GD	Negative	acidic	II			Low
318	M	50	GD		neutral				Low
319	M	53	GC		Mucus-free					Diffuse
320	F	74	GC		Mucus-free					Intestinal
321	M	72	GC		Mucus-free					Intestinal	III
322	F	66	GC	Positive	Mucus-free					Diffuse	III
323	M	67	AG	Negative	acidic	II	Antrum	Severe
324	F	55	GC	Negative	Mucus-free					Intestinal	III
325	M	51	GD		neutral				Low
326	M	56	GD		acidic	III			Low
327	M	58	AG		acidic	III	Antrum	Moderate
328	M	58	GC		Mucus-free					Intestinal	III
329	M	66	GC	Negative	acidic	II				Intestinal	III
330	F	58	GD	Negative	acidic	II			Low
331	F	41	GC	Positive	Mucus-free					Diffuse
332	M	50	GD		acidic	III			Low
333	F	67	GD		neutral				Low
334	M	78	GC		acidic	II				Intestinal	III
335	F	52	AG	Positive	acidic	I	Antrum	Severe
336	F	50	GD		acidic	III			Low
337	M	62	GC		Mucus-free					Intestinal
338	M	66	GC	Negative	Mucus-free					Intestinal	III
339	M	75	GC		Mucus-free					Unclassifiable
340	M	59	GC	Positive	Mucus-free					Intestinal	III
341	F	64	GD		Mucus-free				Low
342	M	62	GD		acidic	III			Low			III
343	F	70	GC		Mucus-free					Intestinal
344	M	60	AG	Positive	acidic	II	Antrum	Moderate
345	F	82	GD	Negative	Mucus-free				High		III	III
346	F	49	GD	Positive	Mucus-free				High		III	III
347	M	64	GC	Positive	Mucus-free					Unclassifiable	III
348	M	63	GD		acidic	II			Low
349	M	59	AG		acidic	III	Corpus	Moderate
350	F	55	GC		Mucus-free					Diffuse
351	M	68	GD		Mucus-free				High
352	M	52	GD		neutral				Low			III
353	M	78	GD		Mucus-free				High		III	III
354	M	62	GC	Positive	Mucus-free					Intestinal
355	M	72	GC	Negative	Mucus-free					Intestinal	I
356	M	72	GD	Negative	neutral				Low		II	II
357	M	72	GD	Negative	Mucus-free				High		III	III
358	M	72	GD	Negative	Mucus-free				High		III	III
359	M	77	GD		acidic	III			Low
360	M	59	GC		Mucus-free					Intestinal
361	M	77	AG	Positive	acidic	II	Antrum	Moderate
362	F	58	GD		Mucus-free				High		III	III
363	F	83	GD	Negative	Mucus-free				High		III	III
364	M	77	GC	Positive	Mucus-free					Unclassifiable	III
365	M	58	GD		Mucus-free				High		III	III
366	M	51	GC		Mucus-free					Diffuse
367	F	49	GD		neutral				Low
368	M	48	GD		Mucus-free				Low			III
369	F	49	GD		Mucus-free				High
370	M	52	GD		Mucus-free				High		III	III
371	M	53	GD		Mucus-free				Low			III
372	M	46	AG	Positive	acidic	II	Corpus	Mild
373	M	78	GD		Mucus-free				Low			III
374	M	37	GC		Mucus-free					Diffuse	III
375	F	86	GD		acidic	III			High			II
376	M	65	GD	Negative	Mucus-free				High		III	III
377	M	50	GD	Negative	Mucus-free				High		III	III
378	M	60	AG		neutral		Corpus	Moderate
379	M	60	AG		acidic	III	Angle	Moderate
380	M	59	GD	Negative	Mucus-free				High		I	I
381	M	59	GC	Negative	Mucus-free					Intestinal
382	M	62	GD		acidic	III			High
383	M	58	AG	Positive	acidic	II	Antrum	Moderate
384	M	65	GD		Mucus-free				Low			III
385	M	78	GC	Negative	Mucus-free					Intestinal	III
386	M	66	GD	Positive	acidic	III			Low
387	F	65	GD		Mucus-free				Low			III
388	F	64	GD		acidic	III			Low
389	M	62	GC	Negative	Mucus-free					Unclassifiable
390	F	76	GD		Mucus-free				Low
391	F	72	AG		acidic	III	Corpus	Moderate
392	M	55	GD		acidic	III			Low
393	F	71	GC		Mucus-free					Unclassifiable	III
394	F	65	GD		acidic	III			Low
395	M	68	GC		Mucus-free					Diffuse
396	M	37	AG		acidic	III	Antrum	Severe
397	M	43	GC	Positive	Mucus-free					Diffuse
398	F	81	GC	Positive	Mucus-free					Mix	III
399	F	81	GC	Positive	Mucus-free					Intestinal	III
400	F	77	GD		Mucus-free				High
401	M	60	AG		acidic	III	Corpus	Severe
402	M	43	SG		neutral
403	F	39	SG		neutral
404	F	38	SG		neutral
405	F	49	SG		neutral
406	F	32	SG		neutral
407	F	62	SG		neutral
408	M	34	SG		neutral
409	M	50	SG		neutral
410	F	48	SG		neutral
411	F	37	SG		neutral
412	F	43	SG		neutral
413	F	57	SG		neutral
414	F	36	SG		neutral
415	F	54	SG		neutral
416	M	38	SG		neutral
417	M	40	SG		neutral
418	F	51	SG		neutral
419	F	68	SG		neutral
420	M	52	SG		neutral
421	M	40	SG		neutral
422	F	44	SG		neutral
423	F	53	SG		neutral
424	M	38	SG		neutral
425	F	25	SG		neutral
426	F	37	SG		neutral
427	M	65	SG		neutral
428	M	47	SG		neutral
429	F	46	SG		neutral
430	F	40	SG		neutral
431	M	54	SG		neutral
432	F	57	SG		neutral
433	F	55	SG		neutral
434	F	38	SG		neutral
435	M	48	SG		neutral
436	F	31	SG		neutral
437	M	73	SG		neutral
438	F	48	SG		neutral
439	M	26	SG		neutral
440	M	44	SG		neutral
441	F	41	SG		neutral
442	F	39	SG		neutral
443	F	40	SG		neutral
444	M	60	SG		neutral
445	F	41	SG		neutral
446	F	49	SG		neutral
447	F	49	SG		neutral
448	F	39	SG		neutral
449	F	50	SG		neutral
450	F	52	SG		neutral
451	F	46	SG		neutral
452	F	44	SG		neutral
453	F	41	SG		neutral
454	F	53	SG		neutral
455	F	59	SG		neutral
456	F	56	SG		neutral
457	F	40	SG		neutral
458	M	61	SG		neutral
459	M	63	SG		neutral
460	M	68	SG		neutral
461	M	67	SG		neutral
462	M	67	SG		neutral
463	M	78	SG		neutral
464	M	60	SG		neutral
465	M	68	SG		neutral
466	M	64	SG		neutral
467	M	60	SG		neutral
468	M	60	SG		neutral
469	M	77	SG		neutral
470	M	60	SG		neutral
471	M	64	SG		neutral
472	M	66	SG		neutral
473	M	60	SG		neutral
474	M	63	SG		neutral
475	M	60	SG		neutral
476	M	72	SG		neutral
477	M	64	SG		neutral
478	M	64	SG		neutral
479	M	75	SG		neutral
480	M	62	SG		neutral
481	M	61	SG		neutral
482	M	67	SG		neutral
483	M	61	SG		neutral
